# Supplementary material for: Label-free DNA detection based on oligonucleotide-stabilized silver nanoclusters and exonuclease III-catalyzed target recycling amplification
Source: Royal Society of Chemistry journal article supplement (doi:10.1039/c4ay00838c), 2014-01-01
Supplement: c4ay00838c1.pdf [file c4ay00838c1.pdf]

## **Electronic Supplementary Information (ESI)**

### **Label-free DNA detection based on oligonucleotide-stabilized silver nanoclusters and exonuclease III-catalyzed target recycling amplification**

Hui Ma, Wei Wei, Qian Lu, Zhixin Zhou, Henan Li, Linqun Zhang and Songqin Liu\*

*Key Laboratory of Environmental Medicine Engineering, Ministry of Education, School of Chemistry and Chemical Engineering, Southeast University, Jiangning District, Nanjing, 211189, P.R. China. Fax: 86-25-5209061; Tel.: 86-25-52090613; E-mail addresses: liusq@seu.edu.cn*

**Table S1** Sequences of the oligonucleotides used in the assay

| Name                                     | Oligonucleotides sequence (5'-3')                                  |
|------------------------------------------|--------------------------------------------------------------------|
| N-DNA                                    | CCCTTAATCCCCTATAATAAAATTTTAAATATTATTTATTAATAAAAAA                  |
| G-DNA                                    | ATTAATAAATAATATTTAAAATTTATTATAGGGTGGGGTGGGGTGGGG                   |
| T-DNA                                    | CCCCACCCACCCACCCCTATAATAAAATTTTAAATATTATTTATTAATA<br>AAAAA         |
| One-base mismatched<br>target DNA (T1)   | CCCCACCCACCCACCCCTATAATAAA <u>A</u> TTTAAATATTATTTATTAATA<br>AAAAA |
| Three-base mismatched<br>target DNA (T3) | CCCCACCCACCCACCCCTATAATAA <u>TAG</u> TAAATATTATTTATTAATA<br>AAAAA  |
| Random target DNA (RA)                   | GATGAATACCTAGGACACTTACTATTAAACTGGTTTGGGAAAACCAA<br>TATATT          |

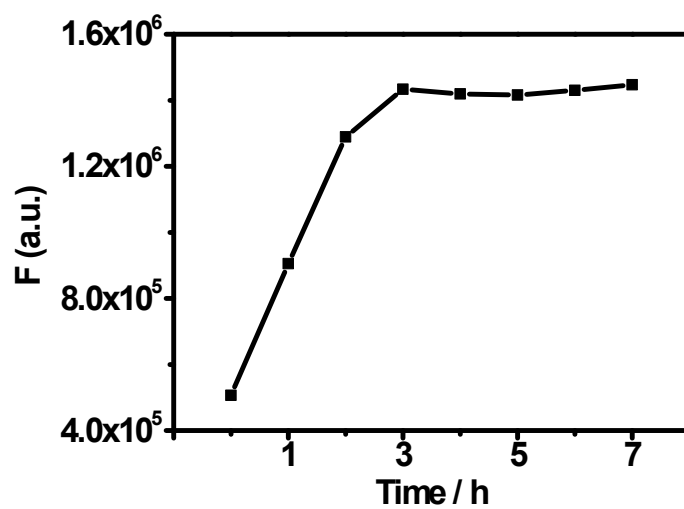

**Fig. S1** Effect of reduction time on the assay.

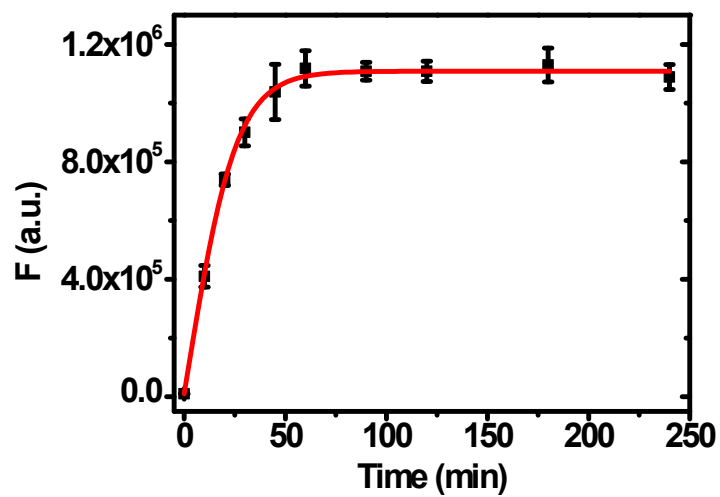

**Fig. S2** Effect of incubation time of N-DNA-Ag NCs enhanced by G-DNA. Error bars are calculated based on three replicates.

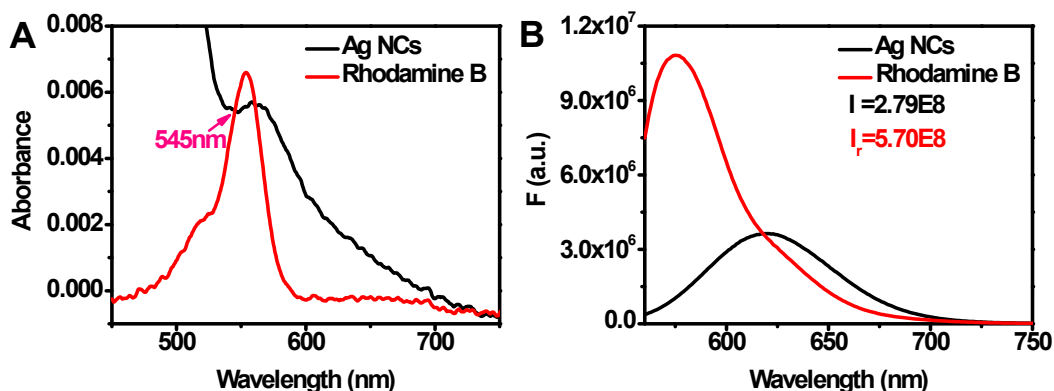

**Fig. S3** (A) UV-vis absorption spectra and (B) fluorescence emission spectra of (black) N/G-DNA-Ag NCs and (red) the standard Rhodamine B with excitation at 545nm, where the absorbance values are equal.

Rhodamine B in water (QY=0.31) is chosen as a standard.<sup>1,2</sup> The quantum yield of N/G-DNA-Ag NCs in water is calculated according to:

$$\Phi = \Phi_r \times \frac{I}{I_r} \times \frac{A_r}{A} \times \frac{n^2}{n_r^2}$$

Where the subscript “r” denotes the reference fluorophore of Rhodamine B,  $\Phi$  is the quantum yield and  $\Phi_r$  is 31%, I is the integrated emission peak areas, A and  $A_r$  are equal in this case, n and  $n_r$  are the refractive indices of the solvents (1.33 for water).

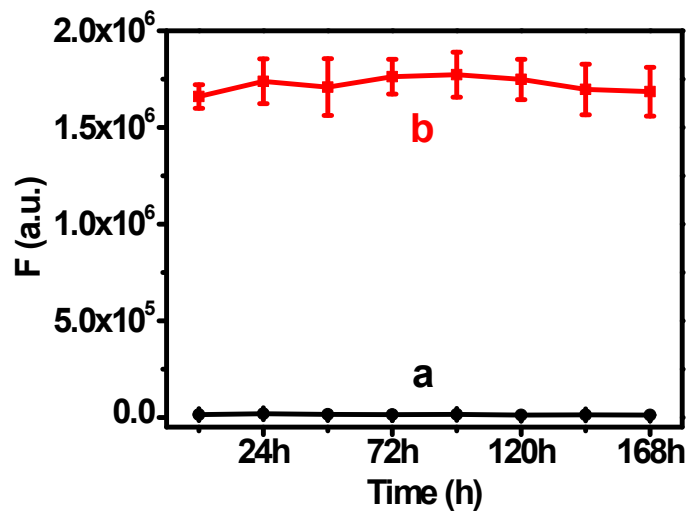

**Fig. S4** Fluorescence changes of (a) N-DNA-Ag NCs and (b) N/G-DNA-Ag NCs within 1 week. Error bars are calculated based on three replicates.

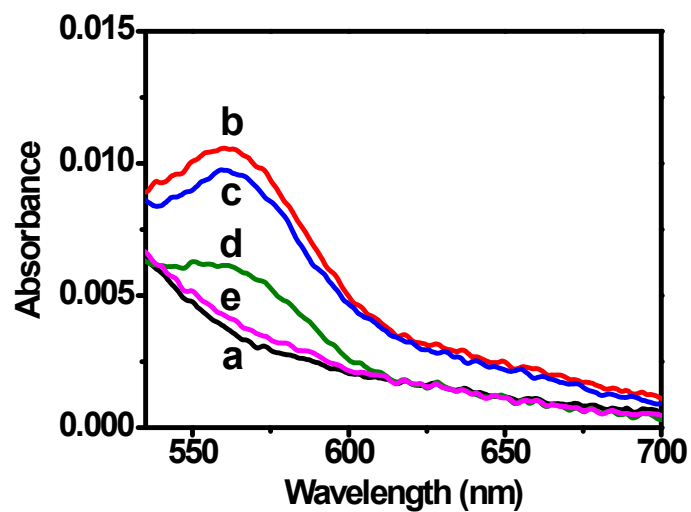

**Fig. S5** UV-vis absorption spectra of solutions (a) N-DNA-Ag NCs, (b) N/G-DNA-Ag NCs, (c) N/G-DNA-Ag NCs in the presence of Exo III. (d) N/G-DNA-Ag NCs in the presence of T-DNA (e) N/G-DNA-Ag NCs in the presence of T-DNA and Exo III. [N-DNA] = 10  $\mu$ M, [G-DNA] = 10  $\mu$ M, [T-DNA] = 1  $\mu$ M, [Exo III] = 300 U.

The successful Exo III amplification was supported by the corresponding UV-vis absorption spectra (Fig. S5). The UV-vis absorption spectra for N-DNA-Ag NCs (curve a), N/G-DNA-Ag NCs (curve b), N/G-DNA-Ag NCs in the presence of Exo III (curve c), N/G-DNA-Ag NCs in the presence of T-DNA (curve d) and N/G-DNA-Ag

NCs in the presence of T-DNA and Exo III (curve e) were fully in accordance with their fluorescence spectra.

## References

- 1 D. Magde, G. E. Rojas and P. G. Seybold, *Photochemistry and Photobiology*, 1999, **70**, 737-744.
- 2 J. H. Shen, Y. H. Zhu, C. Chen, X. L. Yang and C. Z. Li, *Chem. Commun.*, 2011, **47**, 2580-2582.
